# Supplementary material for: Expression profiling of ascorbic acid-related genes during tomato fruit development and ripening and in response to stress conditions
Source: PubMed Central journal article supplement — J Exp Bot. 2009 Jan 6;60(2):663–78. doi: 10.1093/jxb/ern322 (PMC2651456; doi:10.1093/jxb/ern322), 2009-01-06
Supplement: ern322_1.pdf [file ern322_1.pdf]

# **Expression profiling of ascorbic acid-related genes during tomato fruit development and ripening and in response to stress conditions**

*Eugenia Ioannidi, Mary S Kalamaki, Cawas Engineer, Irene Pateraki, Dimitris Alexandrou, Ifigeneia Mellidou, James Giovannonni, and Angelos K Kanellis*

## Supplementary Material

### Supplementary Figure Legends:

**Supplementary Figure S1. Time course expression of AA biosynthetic genes in response to low oxygen regimes.** Total RNA was isolated from mature green tomatoes held under low oxygen environments (0, 0.5, 3, 21% O<sub>2</sub>) for 1h, 6h, 24h, 48h and 72h. RNA (~20 µg) was fractionated in denaturing agarose gels, transferred to Hybond N-membranes and hybridized with specific <sup>32</sup>P-radiolabeled probes. Staining with 0.04% methylene blue was performed to verify the uniformity of RNA loading on the gel. All experiments were performed in triplicate.

**Supplementary Figure S2. Time course expression of AA oxidation and recycling genes in response to low oxygen regimes.** Total RNA was isolated from mature green tomatoes held under low oxygen environments (0, 0.5, 3, 21% O<sub>2</sub>) for 1h, 6h, 24h, 48h and 72h. RNA (~20 µg) was fractionated in denaturing agarose gels, transferred to Hybond N-membranes and hybridized with specific <sup>32</sup>P-radiolabeled probes. Staining with 0.04% methylene blue was performed to verify the uniformity of RNA loading on the gel. All experiments were performed in triplicate.

**Supplementary Figure S3. *Cis*-acting regulatory promoter elements in ascorbate-related gene promoters.** The number of genes (occurrence frequency) in whose promoters each specific element is detected is shown in the graph. Bioinformatic sequence analysis was conducted on ascorbate-related gene promoters by using the PlantCARE program (<http://bioinformatics.psb.ugent.be/webtools/plantcare/html/>). The heat shock responsive element is seen predominantly in the ascorbate biosynthesis gene promoters while the gibberellin-responsive element is seen primarily in ascorbate oxidation and recycling gene promoters.

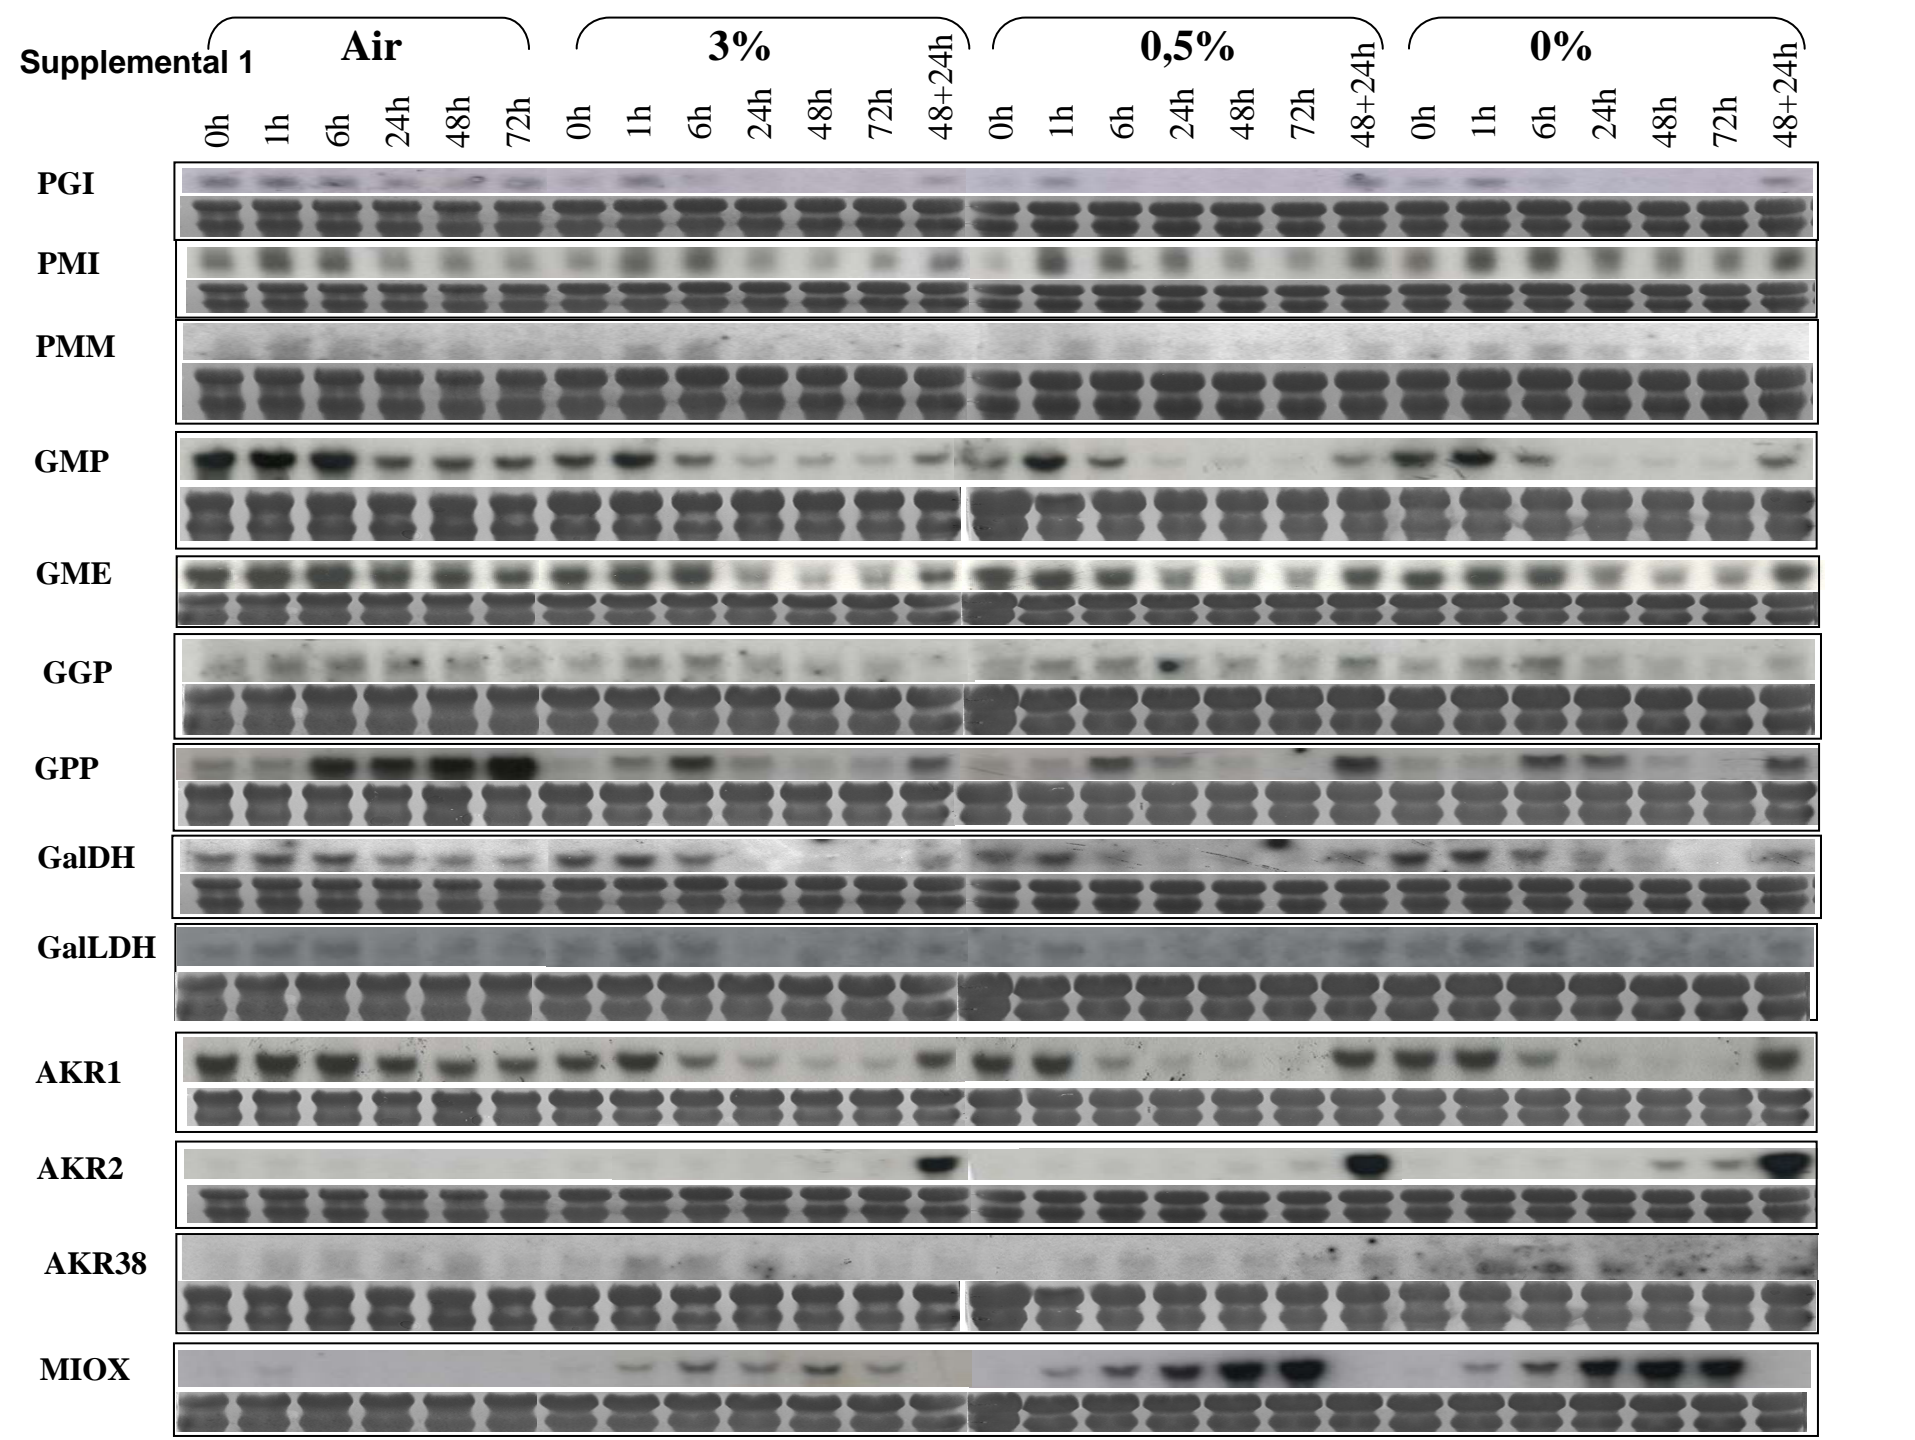

**Supplemental 2**

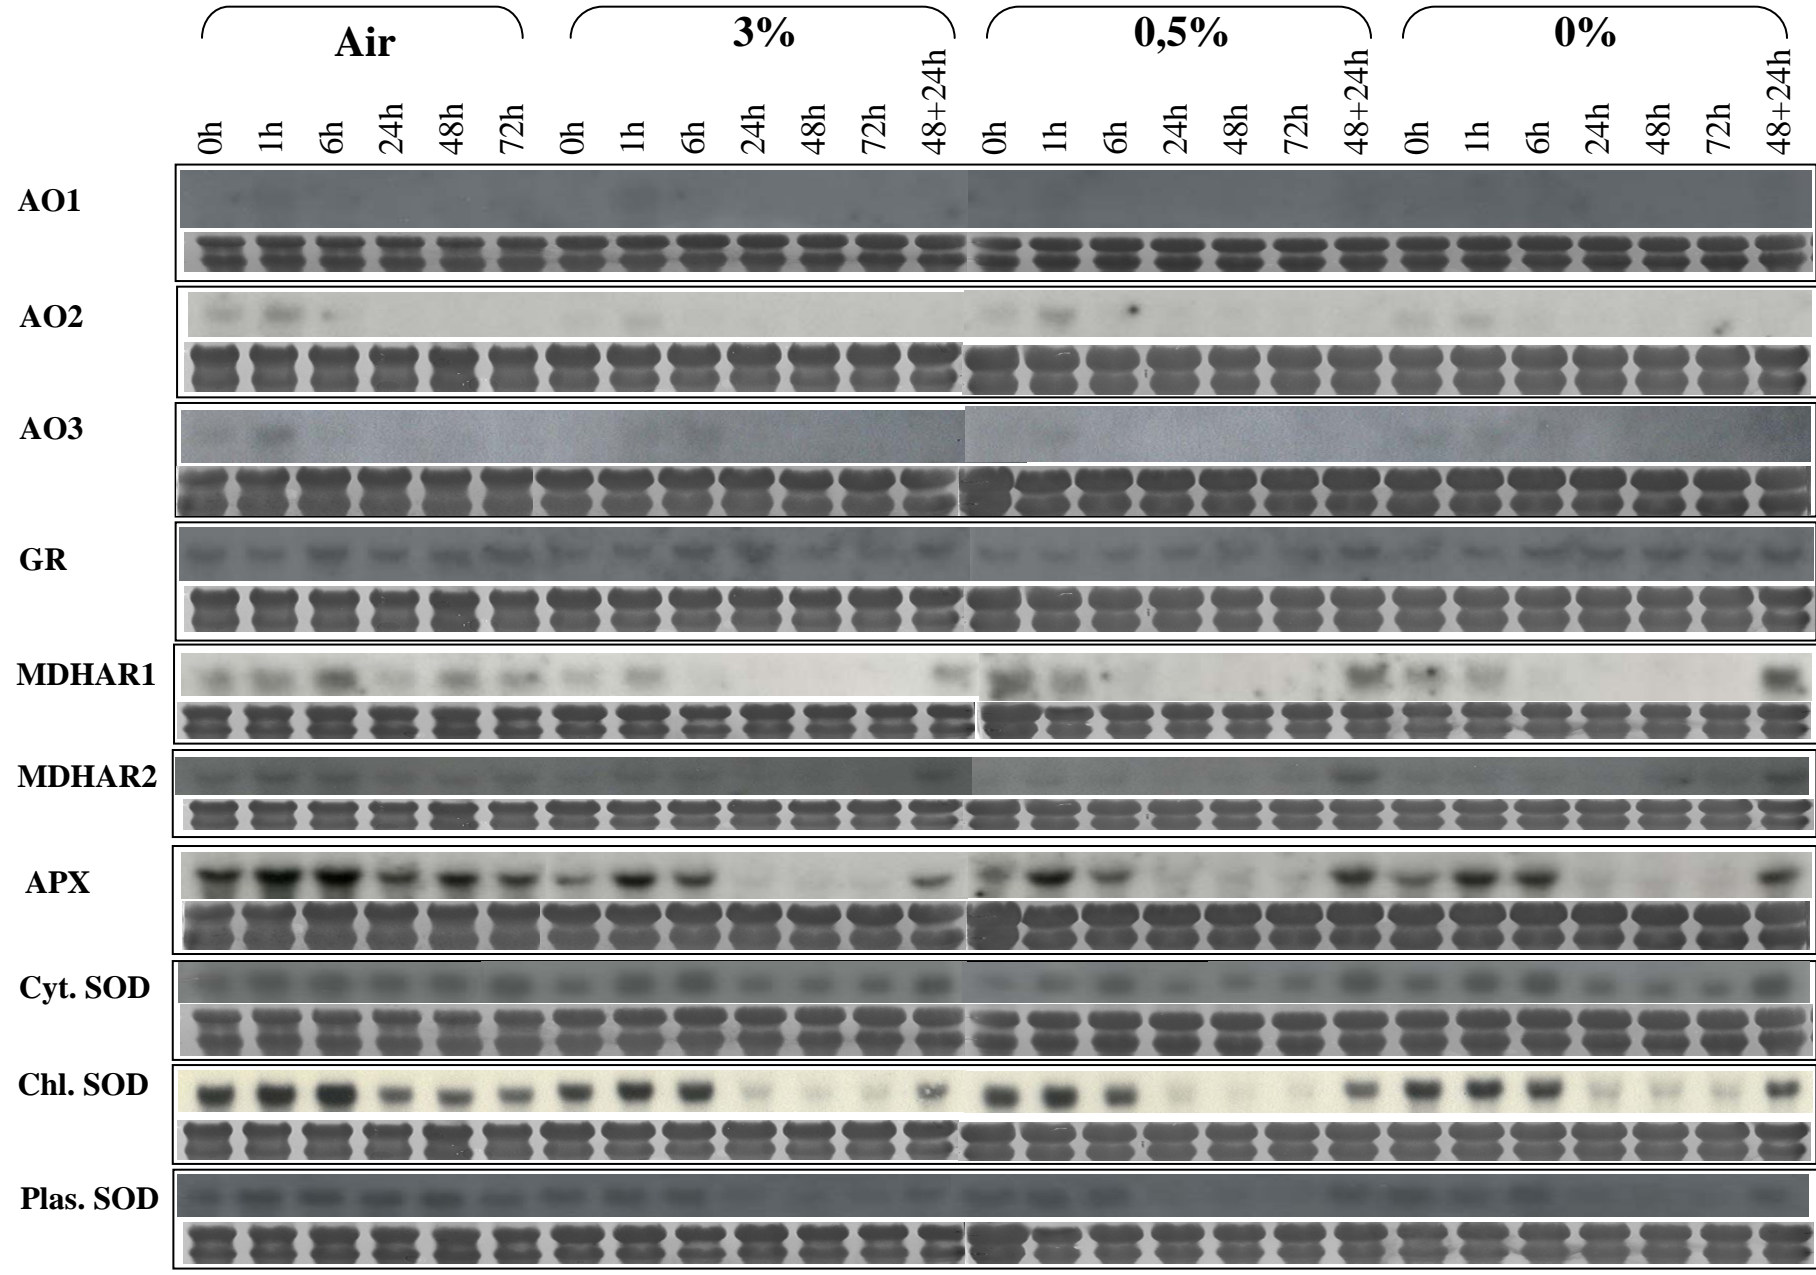

### Supplemental Figure 3

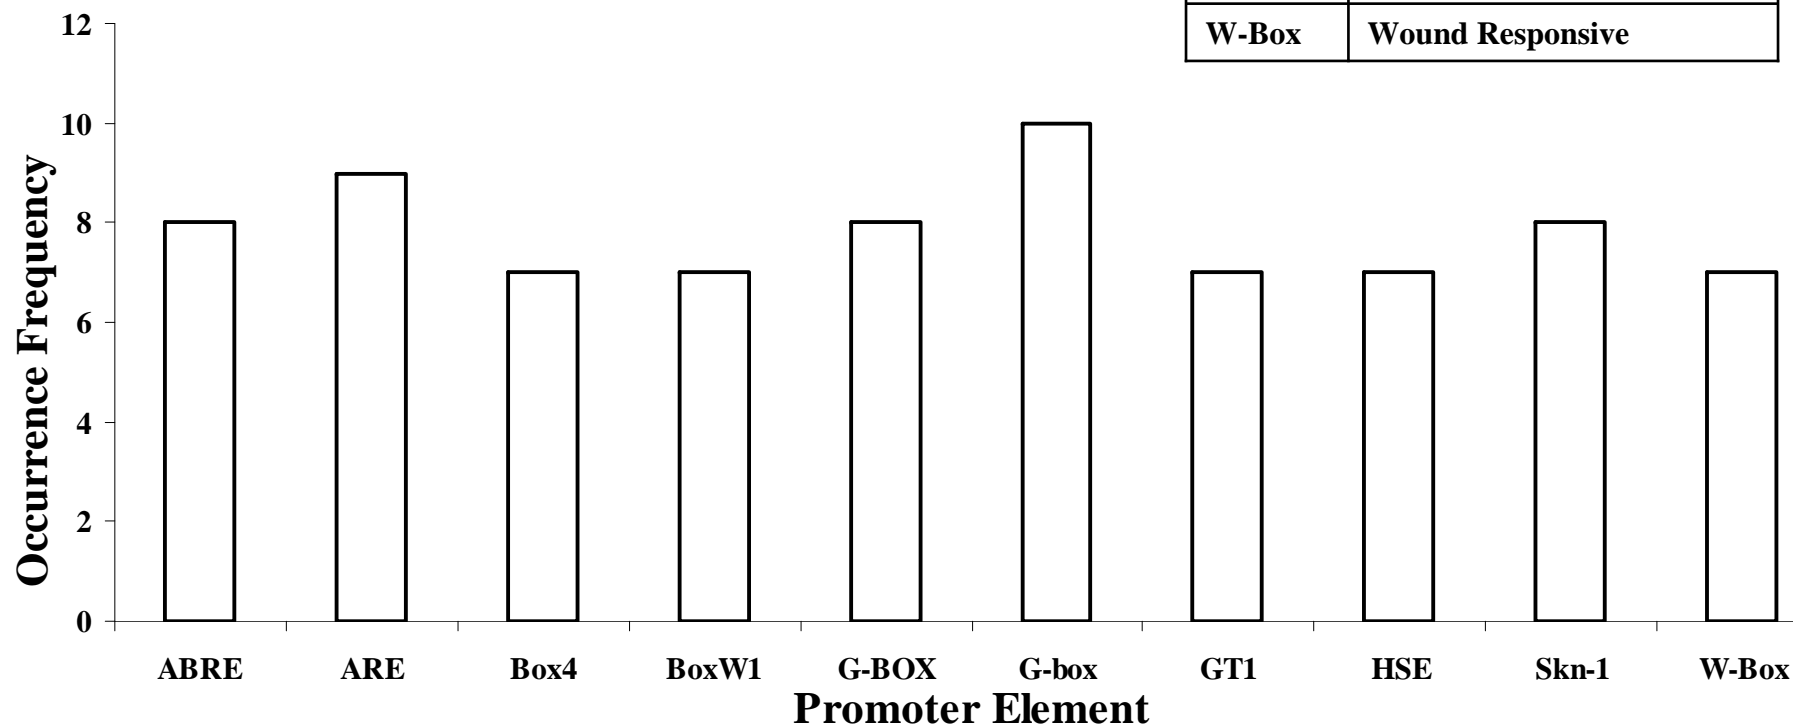

|               |                                   |
|---------------|-----------------------------------|
| <b>ABRE</b>   | <b>ABA Responsive</b>             |
| <b>ARE</b>    | <b>Gibberellin Responsive</b>     |
| <b>Box4</b>   | <b>Light Responsive</b>           |
| <b>Box-W1</b> | <b>Fungal Elicitor Responsive</b> |
| <b>G-BOX</b>  | <b>Light Responsive</b>           |
| <b>G-box</b>  | <b>Light Responsive</b>           |
| <b>GT1</b>    | <b>Light Responsive</b>           |
| <b>HSE</b>    | <b>Heat Shock Responsive</b>      |
| <b>Skn-1</b>  | <b>Endosperm Expression</b>       |
| <b>W-Box</b>  | <b>Wound Responsive</b>           |
